# Supplementary material
Source: MDPI journal article supplement (https://www.mdpi.com/2311-5637/7/1/14)
Supplement: s1 [file s1]

Archive with 2 entries (2 files):
- Informed consent form_oficial.pdf
- Supplementary material_final.docx
